# Supplementary material
Source: PubMed Central journal article supplement (PMC2888150)
Supplement: supp_91_5_1315__1.pdf [file supp_91_5_1315__1.pdf]

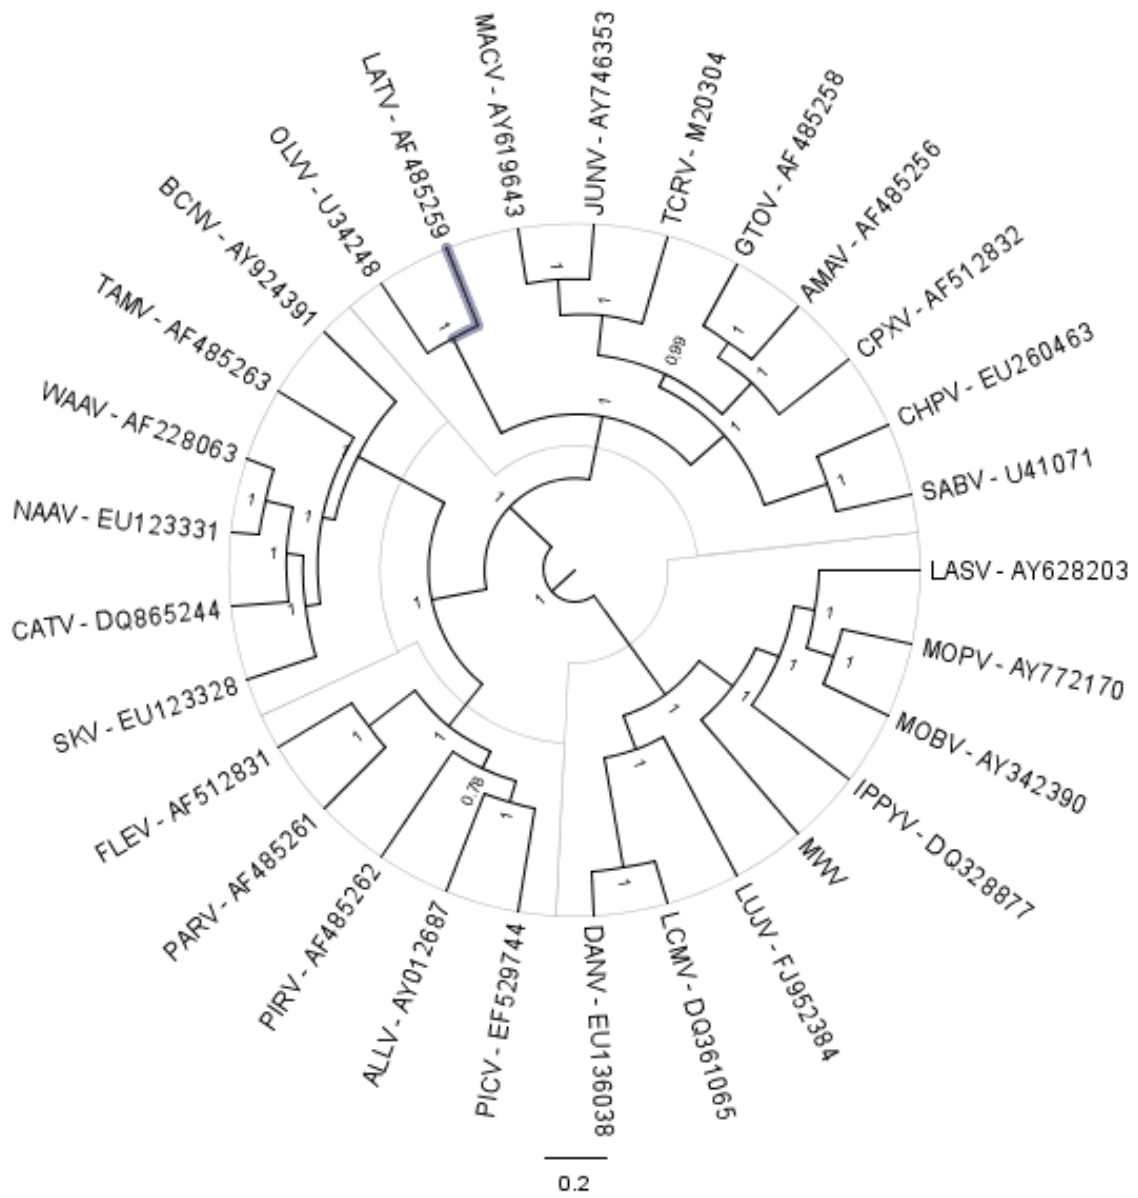

**Supplementary Fig. S1.** Bayesian analyses of Merino Walk virus (MWV), inferred based on the NP nucleotide sequence.



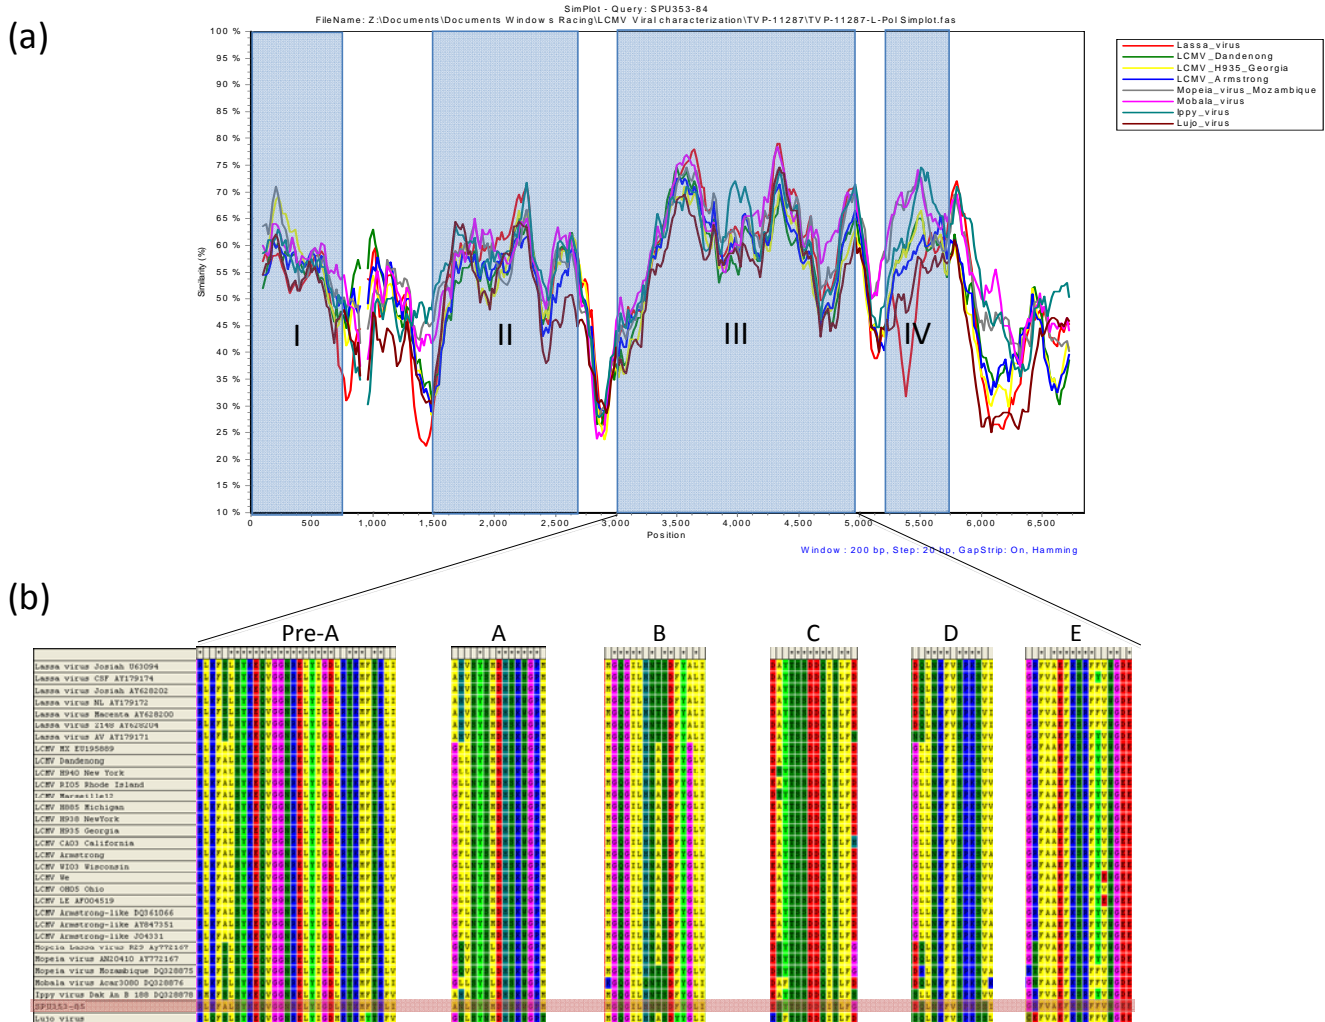

**Supplementary Fig. S3.** Simplot of L segment (a) and motifs (b) in region III (pre-A, A, B, C, D, E) of MWV conserved with other Old World arenaviruses.

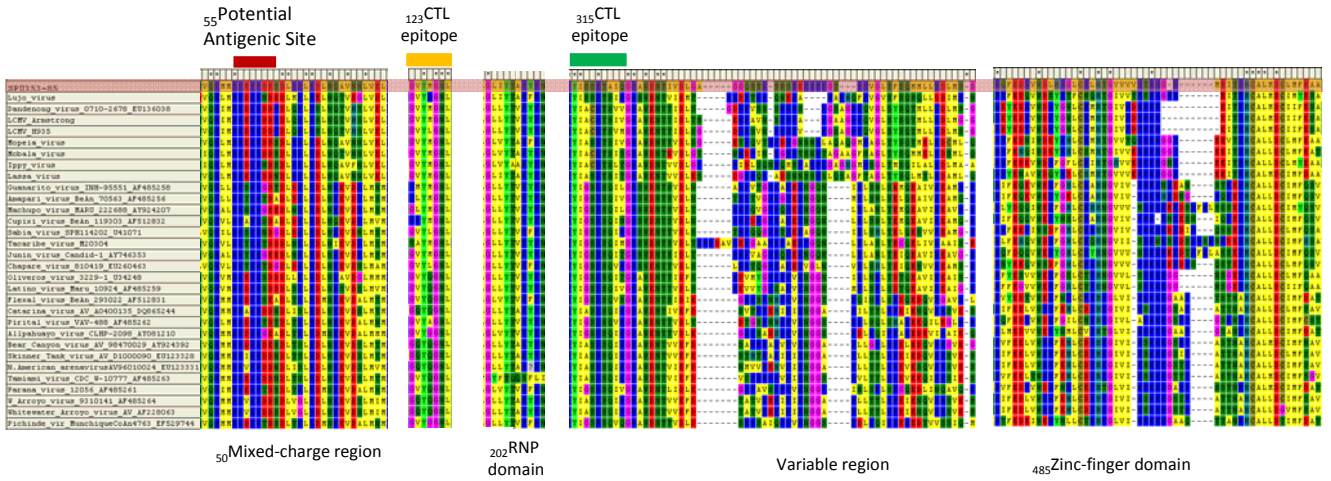

**Supplementary Fig. S4.** Motifs, variable region and zinc-finger domain in the nucleocapsid protein of MWV conserved with other arenaviruses.

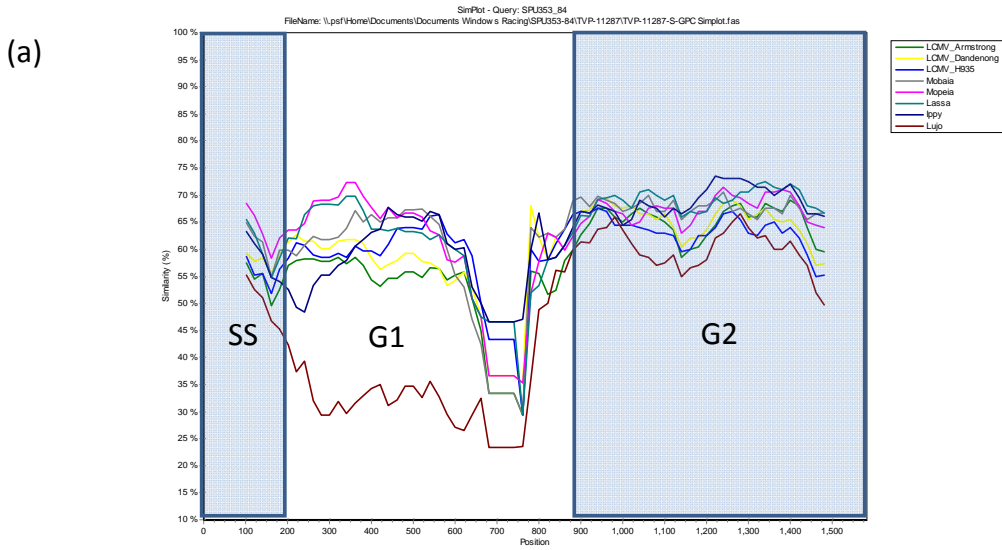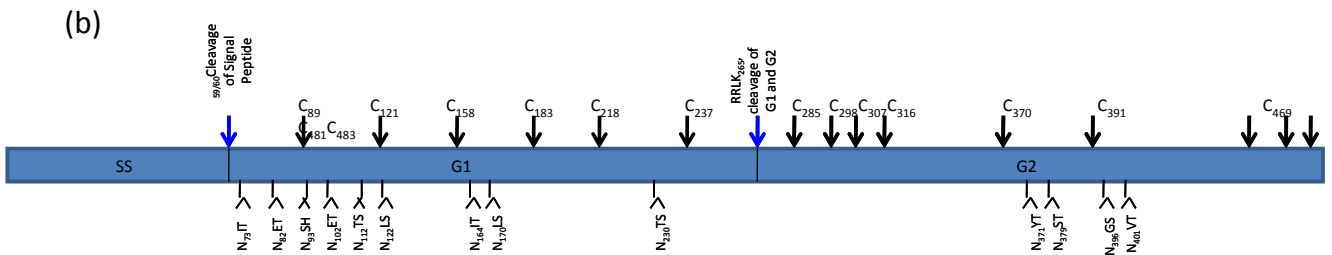

**Supplementary Fig. S5.** Smplot of the M segment (a) with other Old World arenaviruses and conserved motifs (b) among the signal sequence, G1 and G2 proteins.
